# Supplementary material for: Hsa_circ_0000301 facilitates the progression of cervical cancer by targeting miR-1228-3p/IRF4 Axis
Source: Springer Nature journal article supplement (doi:10.1186/s12885-021-08331-4), 2021-05-21
Supplement: MOESM1 [file 19185770]

# **Hsa\_circ\_0000301 facilitates the progression of cervical cancer by targeting miR-1228-3p/IRF4 Axis**

Zhi-Min Deng<sup>1#</sup>, Fang-Fang Dai<sup>1#</sup>, Quan Zhou<sup>2\*</sup>, Yan-Xiang Cheng<sup>1\*</sup>

<sup>1</sup>Department of Obstetrics and Gynecology, Renmin Hospital of Wuhan University, Wuhan, Hubei 430060;

<sup>2</sup>Department of Obstetrics and Gynecology, Renmin Hospital of Yichang, Yichang, Hubei 443000;

<sup>#</sup>Contributed equally to this work

***\*Corresponding author:***

Dr Quan Zhou, Department of Obstetrics and Gynecology, Renmin Hospital of Yichang; Yichang, Hubei 443000; P.R. China;

E-mail: [zhouquan8519@163.com](mailto:zhouquan8519@163.com)

Dr Yan-Xiang Cheng, Department of Obstetrics and Gynecology, Renmin Hospital of Wuhan University; Wuhan, Hubei 430060; P.R. China;

E-mail: [rm001050@whu.edu.cn](mailto:rm001050@whu.edu.cn)

**Supplemental Fig S1.** The complete binding site between miRNAs and hsa\_circ\_0000301. **(A)** hsa-miR-1178-3p & hsa\_circ\_0000301; **(B)** has-miR-1228-3p & hsa\_circ\_0000301; **(C)** hsa-miR-767-3p & hsa\_circ\_0000301.

**Supplemental Table S1.** Features of the DE-circRNAs in [GSE102686](#) dataset with the cut-off criteria of  $|\logFC| \geq 2.0$  and  $\text{adj. } p < 0.05$ .

**Supplemental Table S2.** The target genes of hsa\_circ\_0000301 in cervical cancer with GEPIA2 and MiRWalk.



**Fig S1**

**Supplemental Table S1.** Features of the DE-circRNAs in GSE102686 dataset with the cut-off criteria of  $|\log\text{FC}| \geq 2.0$  and  $\text{adj. } p < 0.05$ .

**Supplemental Table S2.** The target genes of hsa\_circ\_0000301 in cervical cancer with GEPIA2 and MiRWalk.

**Table S1.** Features of the DE-circRNAs in GSE102686 dataset with the cut-off criteria of  $|\log\text{FC}| \geq 2.0$  and  $\text{adj. } p < 0.05$ .

| <b>circRNA</b>   | <b>logFC</b> | <b>AveExpr</b> | <b>adj.P.Val</b> |
|------------------|--------------|----------------|------------------|
| hsa_circ_0065898 | 3.145502     | 10.63247       | 2.30E-05         |
| hsa_circ_0070190 | 2.925457     | 9.312433       | 0.000101         |
| hsa_circ_0000077 | 2.038108     | 10.09865       | 0.000692         |
| hsa_circ_0031027 | 4.278806     | 11.66952       | 0.001097         |
| hsa_circ_0000745 | -2.76177     | 4.9717         | 0.001097         |
| hsa_circ_0043280 | 2.096494     | 9.009097       | 0.001229         |
| hsa_circ_0084927 | -2.22328     | 4.675788       | 0.007166         |
| hsa_circ_0027821 | 2.672016     | 4.411447       | 0.010788         |
| hsa_circ_0000301 | 2.059476     | 6.529432       | 0.011727         |
| hsa_circ_0020926 | 2.086247     | 5.548359       | 0.020165         |
| hsa_circ_0002762 | -2.20839     | 5.144097       | 0.031285         |
| hsa_circ_0046290 | 3.330704     | 4.952161       | 0.036329         |
| hsa_circ_0003037 | -2.14255     | 6.105422       | 0.048003         |

**Note:** logFC, log Fold Change; AveExpr, average expression; adj.P.Val, adjusted *p*-value

**Table S2.** The target genes of hsa\_circ\_0000301 in cervical cancer with GEPIA2 and MiRWalk.

| <b>Sources of genes</b> | <b>Genes</b> |          |       |        |          |        |
|-------------------------|--------------|----------|-------|--------|----------|--------|
| TCGA and<br>MiRWalk     | KLF6         | ZNF385A  | IDS   | MEOX2  | MTR      | LONRF2 |
|                         | ZSCAN18      | NR2F1    | BCL2  | NYNRIN | TFE3     | THRA   |
|                         | EEF2K        | GIGYF1   | TIMP3 | IRF4   | VIPR2    | JAZF1  |
|                         | CXCL16       | SLC25A42 | MEF2D | SBK1   | SYNGR1   | CSRNP1 |
|                         | SNX19        | GPT2     | APBA1 | ZIC5   | SLC39A13 | CD3EAP |
|                         | TMX4         | TAL1     | MEF2C | SLFN13 | OAS3     | PTGER3 |
|                         | ANKRD22      | WNT7B    | MALL  | ZNF516 | ATF5     |        |
